# Supplementary material for: Variation in monitoring and treatment policies for intracranial hypertension in traumatic brain injury: a survey in 66 neurotrauma centers participating in the CENTER-TBI study
Source: Springer Nature journal article supplement (doi:10.1186/s13054-017-1816-9), 2017-09-05
Supplement: MOESM2 [file 15018538]

## Additional file 2. Detailed results

### 1. Definitions used in this paper

|                                                            |                                                                                                                                                                                                                                                                                                                                                                                                                                                                                                                                                                                                                                                                                                                                                                                                                                              |
|------------------------------------------------------------|----------------------------------------------------------------------------------------------------------------------------------------------------------------------------------------------------------------------------------------------------------------------------------------------------------------------------------------------------------------------------------------------------------------------------------------------------------------------------------------------------------------------------------------------------------------------------------------------------------------------------------------------------------------------------------------------------------------------------------------------------------------------------------------------------------------------------------------------|
| Academic hospital                                          | A hospital that is part of or affiliated to a university. An academic hospital aims not only to deliver high-standard patient care, but also contributes to research and education.                                                                                                                                                                                                                                                                                                                                                                                                                                                                                                                                                                                                                                                          |
| First-tier treatments of elevated ICP                      | Intracranial pressure lowering therapies that are used when ICP is raised. These therapies include sedation, paralysis, cerebrospinal fluid removal, and osmotic therapy.                                                                                                                                                                                                                                                                                                                                                                                                                                                                                                                                                                                                                                                                    |
| General Policy                                             | The way the large majority of patients (>75%) with a particular indication would be treated. We are interested in a general consensus on treatment here, rather than individual treatment preferences.                                                                                                                                                                                                                                                                                                                                                                                                                                                                                                                                                                                                                                       |
| ICU model                                                  | <i>Closed</i> – An ICU model where critical care physicians (intensivists) assume primary responsibility for delivery of intensive care for TBI patients. It is possible that other specialists (e.g. neurosurgeon) are consulted for advice when deterioration occurs. However, the intensivist remains responsible.<br><i>Open</i> – An ICU model where the admitting surgeon (neurosurgeon / trauma surgeon) assumes primary responsibility for care of TBI patients, including the provision of critical care services. This model of care may include elective consultation of an intensivist<br><i>Mixed</i> – An ICU model where the admitting surgeon (neurosurgeon / trauma surgeon) assumes primary responsibility for care of TBI patients. A certified physician in critical care (intensivists) coordinate the delivery of care |
| Level I trauma center                                      | A regional resource center that generally serves large cities or population-dense areas. A level I trauma center is expected to manage large numbers of severely injured patients (at least 1,200 trauma patients yearly or have 240 admissions with an injury severity score of more than 14). It is characterized by 24-hour in-house availability of an attending surgeon and the prompt availability of other specialties (e.g. neurosurgeon, trauma surgeon).                                                                                                                                                                                                                                                                                                                                                                           |
| Second-tier treatments or rescue therapies of elevated ICP | Approaches used to treat refractory intracranial hypertension (intracranial hypertension that does not respond to first-tier therapies). These include intensive hyperventilation, barbiturates, hypothermia and (surgical) decompressive craniectomy.                                                                                                                                                                                                                                                                                                                                                                                                                                                                                                                                                                                       |
| Structural variation                                       | A situation in which a different policy exist within one center with regard to diagnostic and therapeutic decisions. For example one or more of the clinicians are generally more likely to place an ICP sensor.                                                                                                                                                                                                                                                                                                                                                                                                                                                                                                                                                                                                                             |

*Abbreviations.* ICP = intracranial pressure; ICU = intensive care unit; TBI = traumatic brain injury.

## 2. Patient-specific reasons for not monitoring ICP

| Contra-indication for ICP monitoring                                                                            | N completed | Number of centers (%)* |
|-----------------------------------------------------------------------------------------------------------------|-------------|------------------------|
| GCS > 8                                                                                                         | 65          | 37 (57%)               |
| No radiological signs of raised ICP                                                                             | 65          | 35 (54%)               |
| Risk of raised ICP considered low                                                                               | 65          | 40 (62%)               |
| Patient considered unsalvageable                                                                                | 65          | 37 (57%)               |
| Coagulopathy (non-drug related)                                                                                 | 65          | 16 (25%)               |
| Use of anticoagulants or platelet aggregation inhibitors                                                        | 65          | 16 (25%)               |
| No local policy or center adheres to a protocol in which treatment is based on imaging and clinical examination | 64          | 9 (14%)                |
| Other contra indication‡                                                                                        | 65          | 2 (3%)                 |

‡Other contra indication: too costly or no device available

\*Number of centers (%) that indicated that the criteria was frequently or always a contra-indication for the placement of an intracranial pressure (ICP) monitor.

*Abbreviations.* GCS = Glasgow Coma Scale; ICP = intracranial pressure.

### 3. Additional neuromonitoring

| Technique                          | N completed | Number of centers (%)* |
|------------------------------------|-------------|------------------------|
| Cerebral microdialysis             | 65          | 4 (6%)                 |
| Transcranial Doppler               | 64          | 24 (38%)               |
| Cerebral blood flow probes         | 63          | 3 (5%)                 |
| Jugular venous saturation monitors | 64          | 6 (9%)                 |
| Near infrared monitors             | 64          | 1 (2%)                 |
| Brain tissue oxygenation           | 64          | 12 (19%)               |
| Other‡                             | 64          | 3 (5%)                 |

\*Number of centers that indicated that they frequently or always use this technique in patients with severe traumatic brain injury

‡Other: EEG, non invasive PRx monitor, ICM+

#### 4. Frequency of first-tier therapies that are used to treat severe TBI patients with elevated ICP

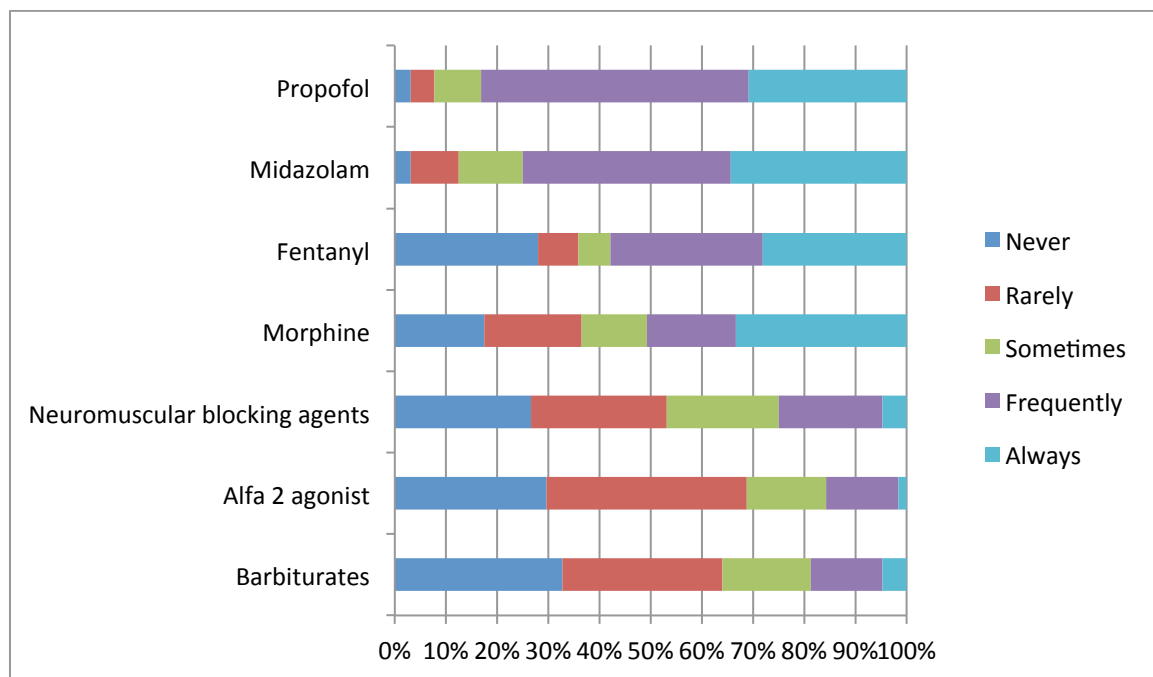

**5. Number of first-tier treatments that are generally (frequently or always) used for the treatment of elevated intracranial pressure**

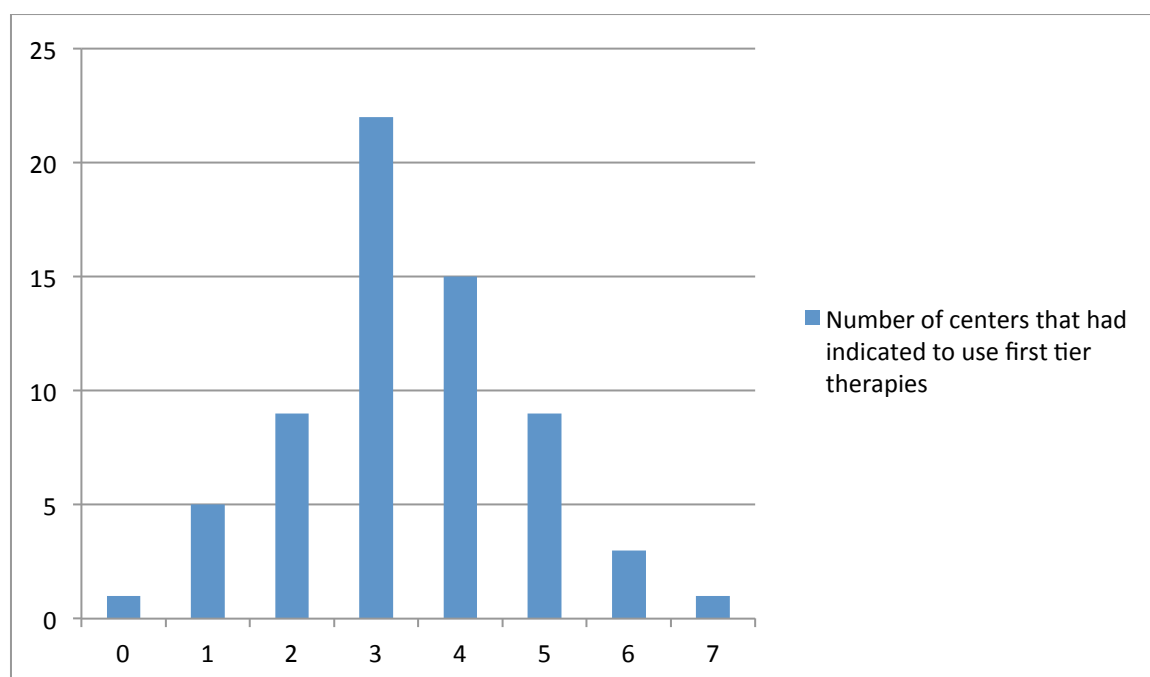

Figure presents the number of first-tier therapies that are generally used by the participating centers. On the x-axis the number of first-tier therapies (range 1-7) are presented and on the y-axis the number of centers (total: 66) are presented.

## 6. Parameters that are used to titrate vasoactive drugs

| Device                                                | N completed | Number of centers (%)* |
|-------------------------------------------------------|-------------|------------------------|
| Mean arterial pressure targets                        | 66          | 51 (77%)               |
| Central venous pressure                               | 66          | 31 (47%)               |
| Pulse index contour continuous cardiac output (PICCO) | 66          | 35 (53%)               |
| LIDCO                                                 | 66          | 3 (5%)                 |
| Oesophageal Doppler monitor                           | 66          | 5 (8%)                 |
| Pulmonary artery catheter                             | 66          | 12 (18%)               |
| Other‡                                                | 66          | 10 (15%)               |

\*Number of center that indicated that they used the device to titrate vasoactive drugs; More than one answer was possible, as long as it represents the generally policy

‡Other: central venous oxygen saturation, echocardiography, ECO heart, sign of volemia (diuresis, capillary refill, pulsus paradoxus, lactate SvO2), transthoracic echo, TTE, ultrasound, vilgileo)

**7. Frequency of the second-tier therapies (decompressive craniectomy, hypothermia, intensive hyperventilation and barbiturates) in the treatment of severe TBI patients with elevated ICP**

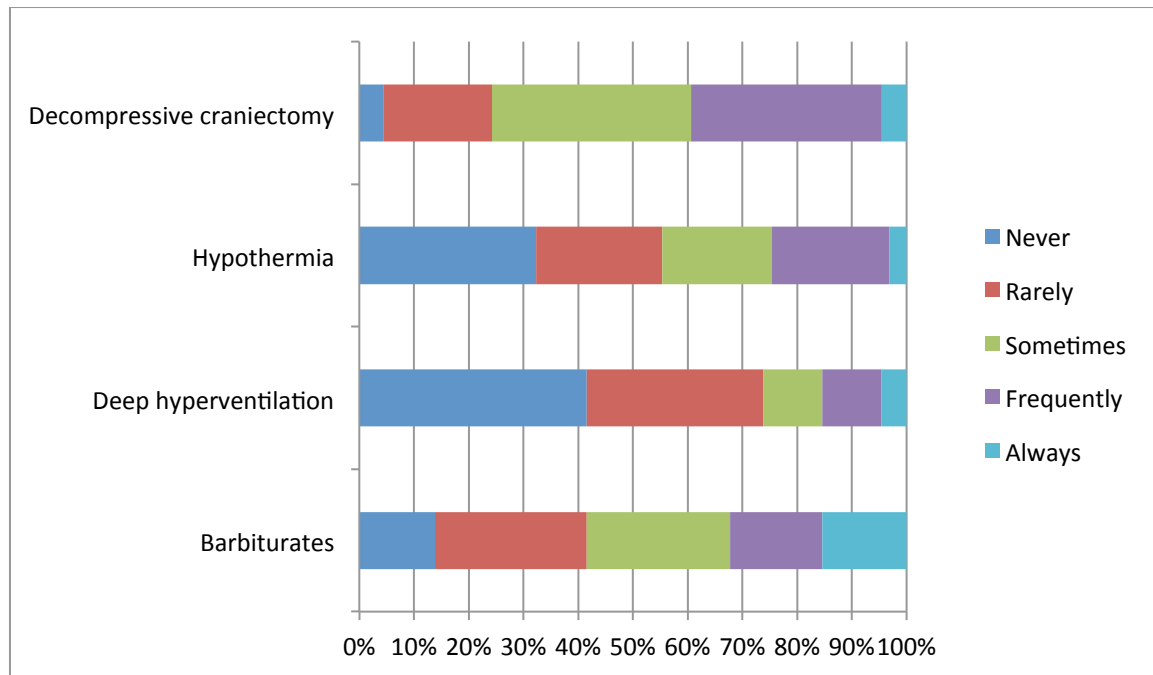

**8. Number of second-tier treatments that are generally (frequently or always) used in combination for the treatment of elevated intracranial pressure**

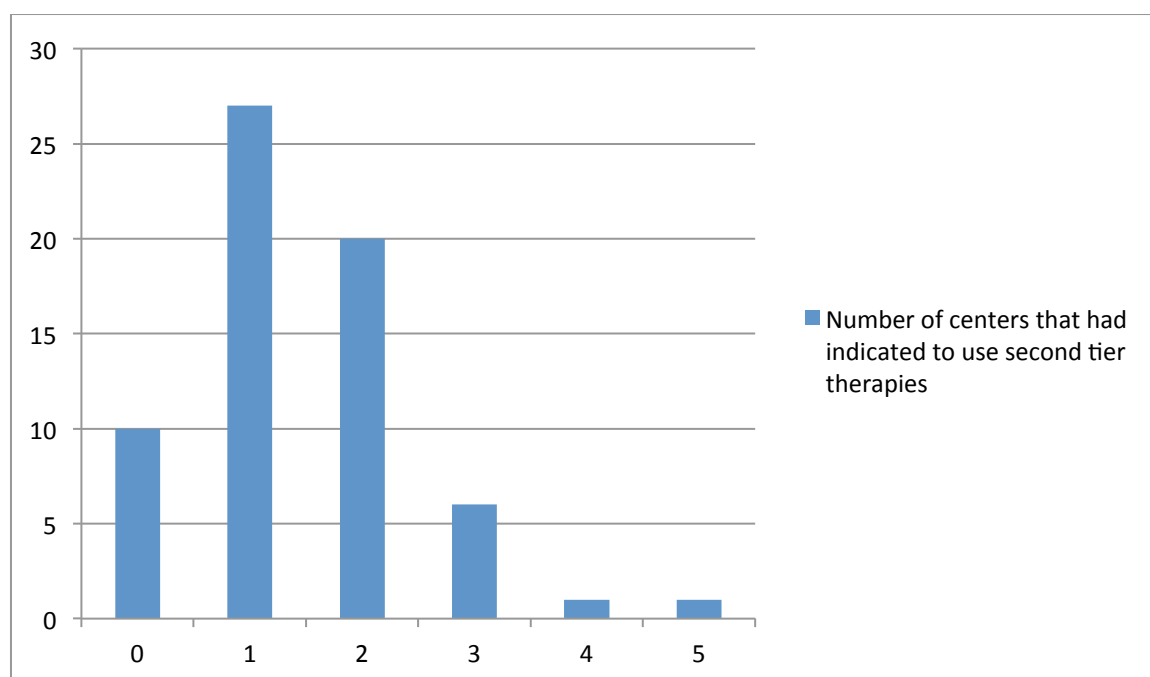

Figure presents the number of second-tier therapies that are generally used by the participating centers. On the x-axis the number of second-tier therapies (range 1-5) are presented and on the y-axis the number of centers (total: 66) are presented



## 9. Hyperventilation as second-tier treatment for elevated ICP

| Characteristic                                                         | N completed | Number of centers (%)* |
|------------------------------------------------------------------------|-------------|------------------------|
| Indications for hyperventilation                                       |             |                        |
| Prophylactic hyperventilation                                          | 39          | 5 (13%)                |
| To manage intracranial pressure for less than 6 hours                  | 38          | 6 (16%)                |
| To manage intracranial pressure for more than six hours                | 39          | 3 (8%)                 |
| In case of imminent herniation                                         | 38          | 23 (61%)               |
| Measurements during hyperventilation                                   |             |                        |
| Brain tissue oxygen monitoring is used to measure cerebral oxygenation | 38          | 8 (21%)                |

\*Number of centers that indicated that they use apply the indication or the PaCO<sub>2</sub> target frequently or always as second-tier therapies in patients with severe TBI
